# Supplementary material for: Circulating Exosomal microRNAs as Predictive Biomarkers of Neoadjuvant Chemotherapy Response in Breast Cancer
Source: MDPI journal article supplement (doi:10.3390/curroncol29020055), 2022-01-28
Supplement: s1 [file s1]

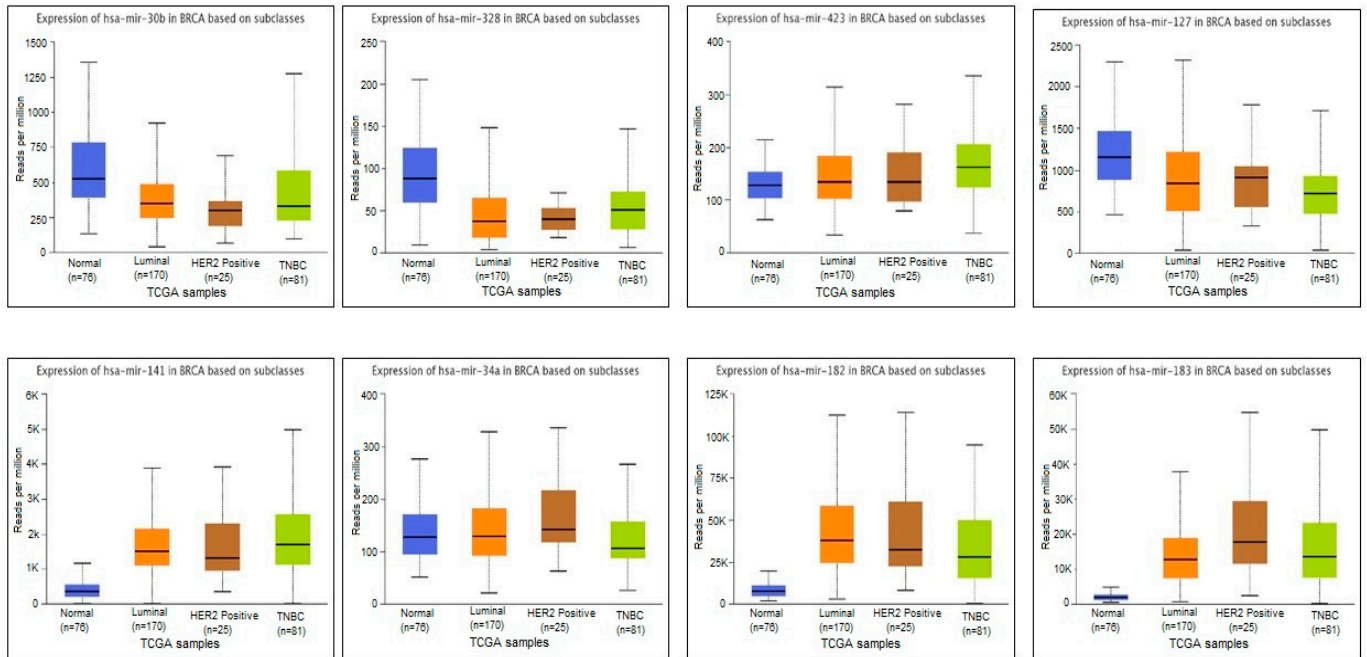

**Figure S1.** Expression profiles of miRNAs with respect to breast cancer subclass.

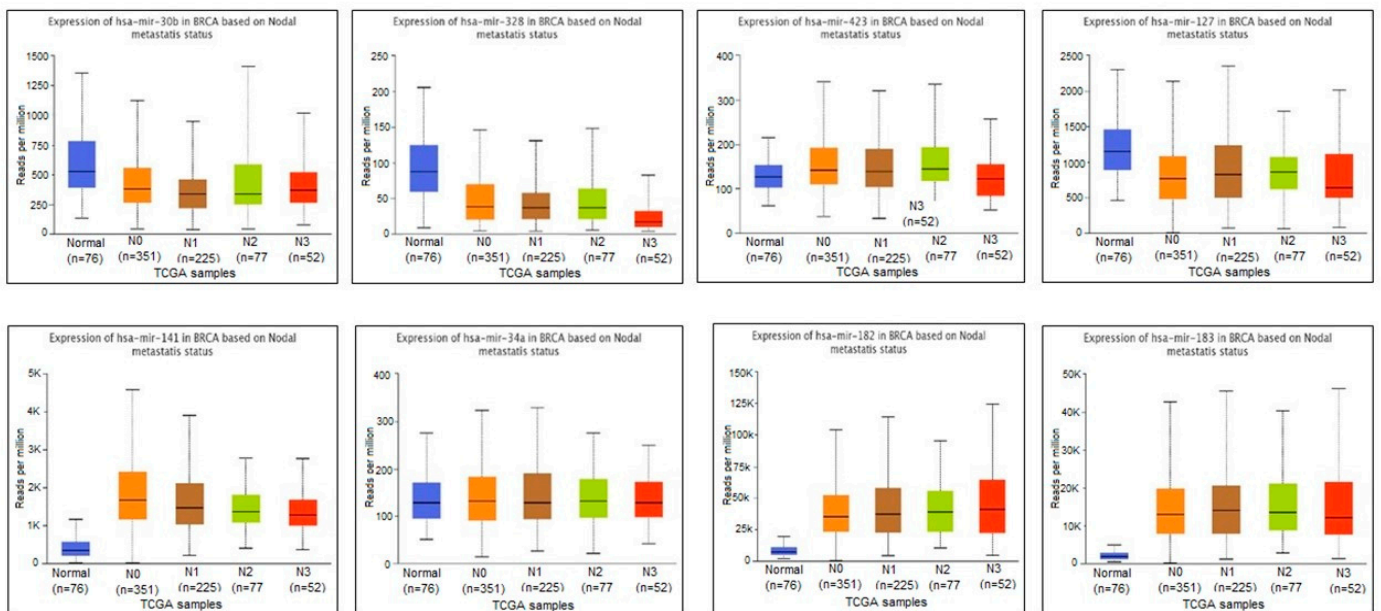

**Figure S2.** Expression profiles of miRNAs in relation to nodal metastasis status.

**Table S1.** Review of the literature. Publications in Pubmed on mir-30b-5p, mir-423-5p, mir-328-3p, mir-127, mir-141, mir-34a, mir-182 and mir-183 in breast cancer.

| miRNA   | Tumor tissue                                                                  | Expression in breast cancer (BC)                                                                                                                                                                             | PMID     |
|---------|-------------------------------------------------------------------------------|--------------------------------------------------------------------------------------------------------------------------------------------------------------------------------------------------------------|----------|
| mir-30b | Serum and urine extracellular vesicles from TNBC patients and TNBC cell lines | Downregulation in cells treated with epirubicin, gemcitabine and paclitaxel; downregulation in untreated TNBC versus healthy controls, no clear pattern in the expression into responders and non-responders | 31789396 |
|         | Plasma exosomes                                                               | Downregulation associated with recurrence                                                                                                                                                                    | 30154547 |
|         | Serum                                                                         | Downregulated in BC patients comparison with healthy controls                                                                                                                                                | 24866395 |
|         | BC cell lines                                                                 | Upregulated (including its target CCNE2) in trastuzumab resistant BC calls.                                                                                                                                  | 28120942 |
|         | Primary tumors                                                                | Downregulation of mir-30 family members associated with poor relapse-free survival                                                                                                                           | 30042152 |
|         | BC cell lines and tumor tissue                                                | Upregulation promoted cell proliferation and invasion in TNBC cell lines, but inhibited apoptosis via targeting ASPP2 and AKT pathway                                                                        | 32420372 |
|         | Whole blood                                                                   | Upregulated in patients with early BC in comparison with healthy controls                                                                                                                                    | 28359916 |
|         | Tumor tissue from luminal BC without metastasis                               | Higher in sensitive to endocrine treatment tumors in comparison with the resistant tumors                                                                                                                    | 31572437 |
|         | Tumor tissue                                                                  | Downregulated in tumors in comparison with the adjacent non-cancer tissue.                                                                                                                                   | 22524830 |
|         | Plasma                                                                        | Age-related downregulation                                                                                                                                                                                   | 25333486 |
| mir-423 | Plasma and cancer tissue versus adjacent normal tissue                        | Overexpression in advanced disease, both in plasma and tumor tissue versus controls                                                                                                                          | 31888645 |
|         | Tumor tissue and normal tissue, BC cell lines                                 | Upregulation enhanced viability, migration and angiogenesis of breast cancer cells                                                                                                                           | 31213129 |
|         | BC cell lines, tumor tissue                                                   | Upregulated and correlate with poor prognosis                                                                                                                                                                | 32606763 |
|         | BC cell lines                                                                 | Upregulated in exosomes from chemoresistant to cisplatin TNBC cells                                                                                                                                          | 31424364 |
|         | BC tissue                                                                     | Upregulation in surgical specimens versus pre-neoadjuvant biopsies                                                                                                                                           | 27746365 |
|         | BC cell lines, tumor tissue                                                   | Upregulated in chemoresistant cells, activate ZFP36                                                                                                                                                          | 32158228 |
|         | Plasma, during and after doxorubicin NACT chemotherapy                        | Upregulation associated with <u>chemotherapy-related cardiotoxicity</u>                                                                                                                                      | 29378531 |
|         | PubMed, EMBASE and Web of Science databases                                   | Polymorphisms associated with increased or decreased risk of BC                                                                                                                                              | 28415619 |
|         | Plasma                                                                        | Age-related downregulation                                                                                                                                                                                   | 25333486 |

|         |                                                               |                                                                                                                                                                                   |          |
|---------|---------------------------------------------------------------|-----------------------------------------------------------------------------------------------------------------------------------------------------------------------------------|----------|
| mir-328 | BC cell line, tumor and adjacent tissue                       | Downregulated in BC tissue                                                                                                                                                        | 29620238 |
|         | Tumor and adjacent tissue, BC cell lines                      | Downregulated in BC tissue, regulate GRM4                                                                                                                                         | 31492116 |
|         | BC cell lines                                                 | Downregulation associated with ABCG2 overexpression in mitoxantrone-resistant BC cells                                                                                            | 19270061 |
| mir-127 | TCGA BRCA (GEO: GSE19536, GSE38167, GSE59829)                 | Downregulation in TNBC tumors compared to normal tissue; decreased in lymph node metastasis in TNBC                                                                               | 31694904 |
|         | BC tissue and tumor-surrounding normal tissue                 | Downregulation correlated with lymph node metastasis and advanced clinical stage. Upregulation inhibited growth, enhanced apoptosis and reduced invasion by targeting BCL-6       | 25477702 |
|         | Breast cancer cell lines TNBC                                 | miR-127 prodrug suppressed growth and metastasis in TNBC, increased disease free survival                                                                                         | 31694904 |
|         | BC cell lines, BC tissues and tumor-surrounding normal tissue | Downregulation was associated with upregulation of BCL-6                                                                                                                          | 24282530 |
| mir-141 | Needle-aspiration tumor samples                               | Upregulated in tumors before taxene-anthracycline NACT in patients with non-pCR. Elevated mir-141 predict poor clinical response to taxene-anthracycline neoadjuvant chemotherapy | 26078798 |
|         | Serum                                                         | Upregulation associated with shorter brain metastasis survival                                                                                                                    | 27075851 |
|         | Plasma                                                        | Upregulation associated with metastasis, regulated by FOXP3-KAT2B axis                                                                                                            | 28637482 |
|         | BC cells                                                      | Upregulation conferred resistance in docetaxel-sensitive cells, correlated with EIF4E expression changes                                                                          | 25813250 |
|         | Whole blood                                                   | Upregulation in the blood of patients with stage I-III, lymph node metastasis, and HER2 negative tumors                                                                           | 25885099 |
|         | BC cell lines                                                 | Downregulated in trastuzumab –resistant cells by affecting expression of CDK8                                                                                                     | 31087707 |
|         | BC cell lines                                                 | Downregulated in trastuzumab –resistant cells by upregulating ERBB4                                                                                                               | 30746756 |
|         | Tumor tissue                                                  | Upregulated in doxorubicin-resistant BC tissue                                                                                                                                    | 25451164 |
|         | BC cell lines                                                 | Upregulated in docetaxel-resistant cells                                                                                                                                          | 21399894 |
|         | Plasma                                                        | Upregulated in plasma of circulating tumor cells (CTC)-positive patients with metastatic BC compared to CTC-negative patients                                                     | 22952344 |

|         |                                                                                                                            |                                                                                                                                                   |          |
|---------|----------------------------------------------------------------------------------------------------------------------------|---------------------------------------------------------------------------------------------------------------------------------------------------|----------|
| mir-34a | Plasma and tumor tissue                                                                                                    | Upregulated in plasma and tumor tissue after NACT in patients with pCR, especially increased after anthracycline-based chemotherapy               | 25078559 |
|         | Blood                                                                                                                      | Downregulated after two cycles of NACT in patient insensitive to chemotherapy not-sensitive to                                                    | 30099860 |
|         | Metastasizing BC cell lines and tumor tissue from mice and patients                                                        | Downregulated in metastatic BC cells; overexpression inhibits migration and invasion in vitro, metastasis suppressor in vivo                      | 23001043 |
|         | Plasma from TNBC and healthy controls                                                                                      | Downregulated compared to healthy controls, low expression associated with worse overall survival                                                 | 28540980 |
|         | BC cell lines                                                                                                              | Upregulated in docetaxel-resistant cells                                                                                                          | 21399894 |
|         | BC cell lines and tumor tissue                                                                                             | Downregulated in all BC cells; in tumors mir-. inversely correlated with ErbB2 levels,                                                            | 27813227 |
|         | BC cell lines and tumor tissue                                                                                             | Downregulated in multidrug-resistant BC cell line; patients with low expression had poorer overall survival                                       | 29290947 |
|         | Serum from BC patients and healthy volunteers                                                                              | Downregulated in BC patients in comparison with the controls; correlated with tumor stage and hormone receptor status                             | 29854296 |
| mir-182 | DCIS (non-invasive/pre-invasive BC) (ER/PR-positive/HER2 negative) and paired normal epithelium from reduction mammoplasty | Overexpressed in DCIS compared to normal epithelium                                                                                               | 21375733 |
|         | Breast and prostate cancer cells                                                                                           | Mir-182 can be transferred between cells, preferentially packaged in exosomes                                                                     | 27446418 |
|         | Breast cancer cell lines                                                                                                   | Overexpressed in MCF-7 breast cancer cells, associated with downregulation of FOXO1                                                               | 19574223 |
|         | TNBC tumor samples, BC cell lines and animal experiments                                                                   | Upregulated in TNBC tissue and cell lines; promoted tumor metastasis in mice; FOXF2 identified as direct target                                   | 29085483 |
|         | Tumor tissue and BC cell lines                                                                                             | Upregulated in BC tissue associated with poor survival; abrogation of mir-182 inhibited cell proliferation and invasion in BC cells               | 30666836 |
|         | Trastuzumab-resistant BC cells                                                                                             | Downregulation in trastuzumab BC cells, direct target of mir_182 was MET                                                                          | 29925897 |
|         | BC cells, murine xenograft model                                                                                           | Upregulated in BC cells and tissue, associated with poor survival; depletion of mir-182 was associated with up-regulation of PTEN in murine model | 30666836 |

|         |                                                                                                                     |                                                                                                                                                                 |          |
|---------|---------------------------------------------------------------------------------------------------------------------|-----------------------------------------------------------------------------------------------------------------------------------------------------------------|----------|
| Mir-183 | BC cell lines                                                                                                       | Upregulation associated with downregulation of RB1 and enhanced proliferation and migration of BC cells                                                         | 28693273 |
|         | DCIS (non-invasive/pre-invasive BC) (ER/PR-positive/HER2 negative) and normal epithelium from reduction mammoplasty | Overexpressed in DCIS compared to normal epithelium                                                                                                             | 21375733 |
|         | BC tissue, BC cells                                                                                                 | Upregulated in BC tissue and negatively regulated FHL1 in BC cells                                                                                              | 32908787 |
|         | BC tissue and BC cells                                                                                              | Upregulation in BC tissue versus the adjacent normal tissue, enhanced BC cells proliferation and migration, and inhibited apoptosis; PDCD4 as a putative target | 27476679 |
|         | TNBC and surrounding tissue, BC cells                                                                               | Upregulated in TNBC tissue                                                                                                                                      | 24788655 |
|         | Breast and prostate cancer cells                                                                                    | Mir-183 can be transferred between cells, preferentially packaged in exosomes                                                                                   | 27446418 |
|         | Retrospective case study on BC                                                                                      | Upregulation was associated with poor prognosis                                                                                                                 | 25277099 |
